# Supplementary material for: c-Axis-oriented sheet-like Cu/AEI zeolite contributes to continuous direct oxidation of methane to methanol
Source: Royal Society of Chemistry journal article supplement (doi:10.1039/d3cy00584d), 2023-01-01
Supplement: d3cy00584d1.pdf [file d3cy00584d1.pdf]

*Supporting information*

**c-Axis-Oriented sheet-like Cu/AEI zeolite contributed continuous direct oxidative methane to methanol**

Peipei Xiao <sup>a</sup>, Yong Wang <sup>a</sup>, Kengo Nakamura <sup>a</sup>, Yao Lu <sup>a</sup>, Junko N. Kondo <sup>a</sup>, Hermann Gies <sup>a,b</sup>, Toshiyuki Yokoi <sup>a,\*</sup>

<sup>a</sup> Institute of Innovative Research, Tokyo Institute of Technology, 4259 Nagatsuta, Midori-ku, Yokohama 226-8503, Japan

<sup>b</sup> Institute of Geology, Mineralogy und Geophysics, Ruhr-University Bochum, Bochum 44780, Germany

\* Corresponding authors.

E-mail address: yokoi@cat.res.titech.ac.jp

## Characterization of catalysts

XRD pattern was collected on a Rint-Ultima III (Rigaku) using a Cu K $\alpha$  X-ray source (40 kV, 40 mA).

Elemental analyses of the sample were performed on an inductively coupled plasma-atomic emission spectrometer (ICP-AES, Shimadzu ICPE-9000).

Field-emission scanning electron microscopic (FE-SEM) images of the powder samples were obtained on S-5200 (Hitachi) microscope operating at 1 kV.

Nitrogen adsorption and desorption measurements to obtain information on the micro- and meso-porosities were conducted at -196 °C on a Belsorp-mini II (MicrotracBEL).

Solid-state  $^{29}\text{Si}$  and  $^{27}\text{Al}$  MAS NMR spectra were measured on a JEOL ECA-600 spectrometer at a resonance frequency of 156.4 MHz using a 4 mm sample rotor with a spinning rate of 15.0 kHz. The  $^{29}\text{Si}$  and  $^{27}\text{Al}$  chemical shifts were referenced to -34.12 and -0.54 ppm, polydimethylsiloxane (PDMS) and  $\text{AlNH}_4(\text{SO}_4)_2 \cdot 12\text{H}_2\text{O}$ , respectively.

Temperature-programmed ammonia desorption ( $\text{NH}_3$ -TPD) profiles were recorded on Multitrack TPD equipment (Japan BEL). Typically, 25 mg of catalyst was pretreated at 600 °C in He (50 mL min $^{-1}$ ) for 1 h and then cooled to 100 °C. Prior to the adsorption of  $\text{NH}_3$ , the sample was evacuated at 100 °C for 1 h. Approximately 2500 Pa of  $\text{NH}_3$  was allowed to contact with the sample at 100 °C for 10 min. Subsequently, the sample was evacuated to remove weakly adsorbed  $\text{NH}_3$  at the same temperature for 30 min. Finally, the sample was cooled to 100 °C and heated from 100 to 600 °C at a ramping rate of 10 °C min $^{-1}$  in a He flow (50 mL min $^{-1}$ ). A thermal conductivity detector (TCD) was used to monitor desorbed  $\text{NH}_3$ . The amount of acid sites was determined by the fitting peak area of the profiles.

UV-vis spectra were collected in the range of 190-600 nm on a V-650DS spectrometer (JASCO). The diffuse reflectance spectra were converted into the absorption spectra using the Kubelka-Munk function.

Fourier Transform Infrared (FTIR) spectra were obtained by using a JASCO 4100 FTIR spectrometer equipped with a triglycine sulfate (TGS) detector. IR spectra of the clean disk were recorded in vacuum at 25 °C to obtain background spectra. The sample was pressed into a self-supporting disk (20 mm diameter, 30–60 mg) and placed in an IR cell attached to a closed-gas circulation system. The sample was pretreated by evacuation at 500 °C for 1 h, and then the temperature was reduced to -120 °C to measure the hydroxyl vibration and follow by adsorption of 5–120 Pa NO or 5–1000 Pa CO at -120 °C. The IR spectra resulting from the subtraction of the background spectra from those with NO or CO adsorbed are shown unless otherwise noted.

## Catalytic reaction

The continuous oxidation of methane reaction was performed in a fixed-bed flow reactor. The online-reaction-analysis system was equipped with two six-port inlet valves, as Figure S7 displayed. In each run, 100 mg of catalyst in a granular form (400–600  $\mu\text{m}$ ) was charged into a quartz tube (inner diameter 4 mm), which was placed in an electric tube furnace. The catalyst was pretreated at 500 °C for 1 h in an Ar flow. The reaction was conducted at 350 °C in a flowing gas mixture of  $\text{CH}_4$ ,  $\text{N}_2\text{O}$ ,  $\text{H}_2\text{O}$ , and Ar with flow rates of 10, 10, 2, and 3 mL·min $^{-1}$  (Figure S8). The outlet gas, containing the products, unreacted  $\text{CH}_4$  and  $\text{N}_2\text{O}$ , was analyzed using two on-line gas

chromatographs (GC; GC-2014, Shimadzu). One of the GCs was used with a Shin carbon ST 50/80 packed column (Agilent Technologies, inner diameter 3 mm, length 6 m) and a TCD detector. Specifically, GC-TCD was used to detect H<sub>2</sub>, N<sub>2</sub>O, CO, CO<sub>2</sub> and CH<sub>4</sub>. The other GC was equipped with a Porapak Q 80/100 packed column (Agilent Technologies, inner diameter 3 mm, length 6 m), a flame ionization detector (FID), and a methanizer. The GC-FID was used to investigate CH<sub>4</sub>, and the produced methanol (MeOH), dimethyl ether (DME), alkanes, and alkenes. The yield of each carbon-containing product was calculated by considering the number of carbon atoms. The methane conversion in this study was defined as the total obtained products, and calculated as:

$$C_{CH_4} = \frac{\sum (i * C_i)}{\sum (i * C_i) + CH_4}$$

where  $C_{CH_4}$  is the CH<sub>4</sub> conversion,  $i$  is the number of carbon atoms in product  $C_i$ ,  $\sum(i*C_i)$  is the total amount of carbon of all the products, and  $CH_4$  is the amount of CH<sub>4</sub> detected at the same time.

The N<sub>2</sub>O conversion was calculated as:

$$C_{N_2O} = \frac{n_i - n_a}{n_i}$$

where  $C_{N_2O}$  is the N<sub>2</sub>O conversion,  $n_i$  is the initial N<sub>2</sub>O molar weight,  $n_a$  is the N<sub>2</sub>O molar weight after reaction.

Note that, CH<sub>4</sub> and N<sub>2</sub>O conversion were calculated according to different methods, thus they were not equal in value.

The product selectivity is calculated as:

$$S_{C_i} = \frac{i * C_i}{\sum (i * C_i)}$$

where  $S_{C_i}$  is the selectivity of the product  $C_i$ ,  $\sum(i*C_i)$  is the total amount of carbon of all the products.

The product yield is calculated as:

$$Y_{C_i} = \frac{i * C_i}{\sum (i * C_i) + CH_4}$$

where  $Y_{C_i}$  is the yield of the product  $C_i$ ,  $\sum(i*C_i)$  is the total amount of carbon of all the products, and  $CH_4$  is the amount of CH<sub>4</sub> detected at the same time.

The products formation rates are calculated as:

$$R_{C_i} = Y_{C_i} * F_{CH_4} / m_{cat}$$

where  $R_{C_i}$  is the formation rate of product  $C_i$ ,  $F_{CH_4}$  is the initial flow rate of CH<sub>4</sub>,  $m_{cat}$  is the mass of catalyst.

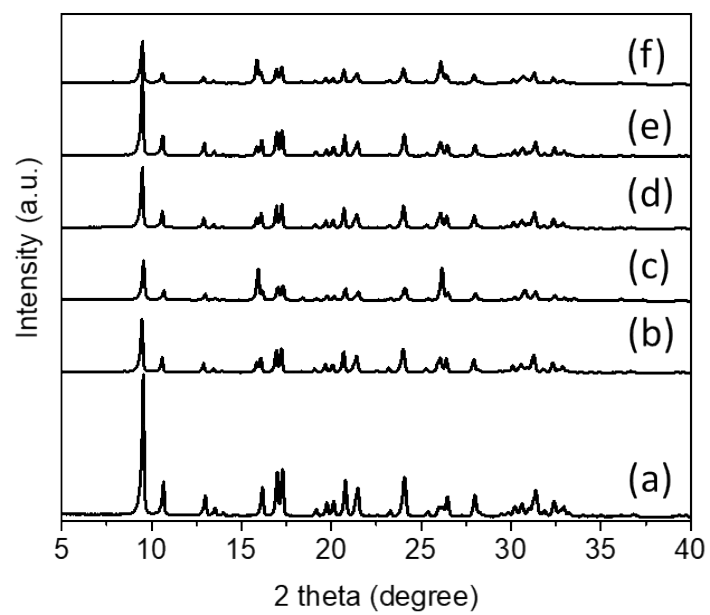

Fig. S1. XRD patterns of (a) refer AEI, (b) H-AEI-C, (c) H-AEI-S, (d) H-AEI-C-700, (e) H-AEI-C-800, (f) H-AEI-S-A-N zeolites.

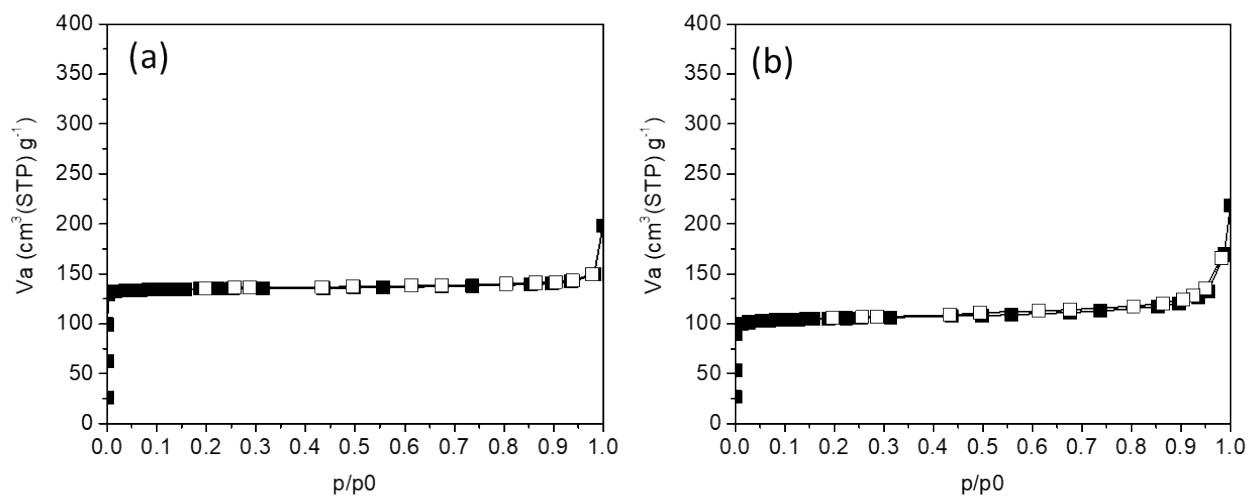

Fig. S2. N<sub>2</sub> adsorption and desorption isotherms of (a) H-AEI-C and (b) H-AEI-S zeolites.

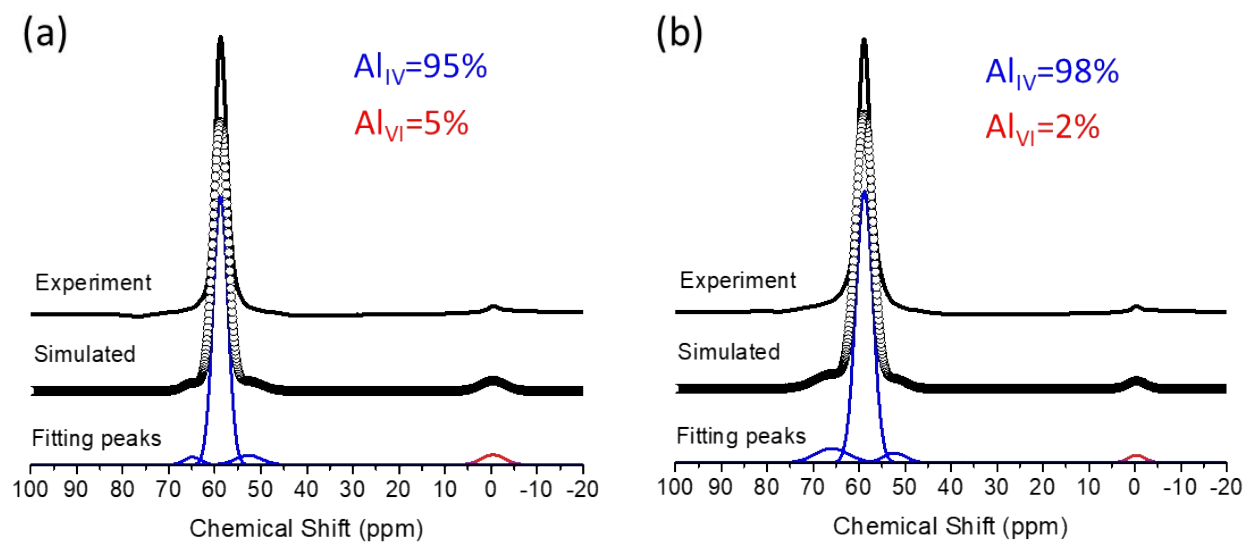

Fig. S3. Deconvolution of  $^{27}\text{Al}$  MAS NMR patterns for (a) H-AEI-C and (b) H-AEI-S zeolites.

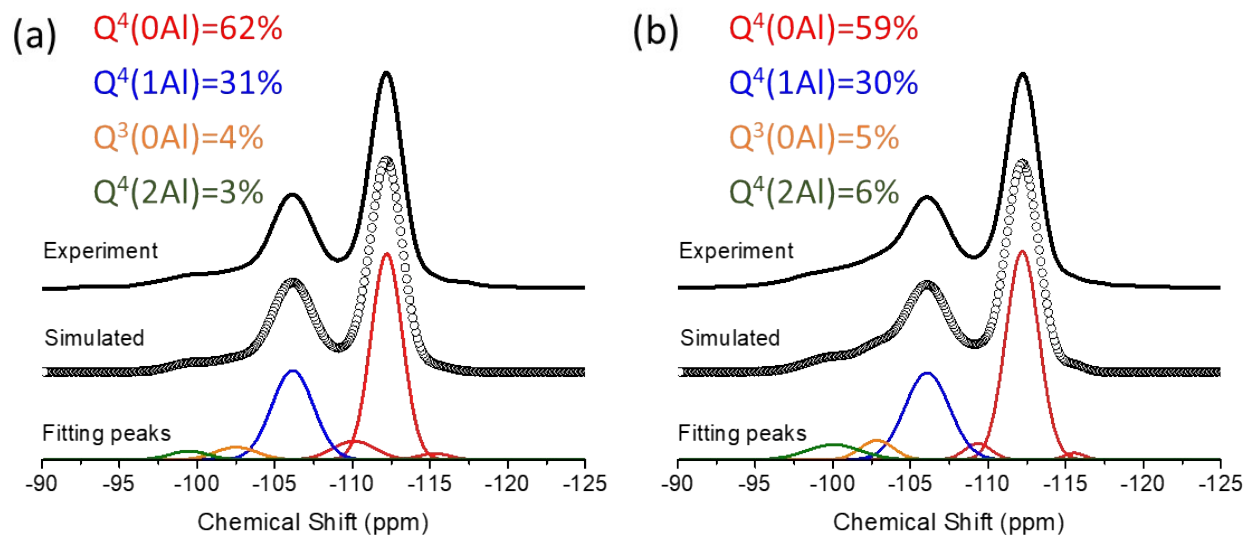

Fig. S4. Deconvolution of  $^{29}\text{Si}$  MAS NMR patterns for (a) H-AEI-C and (b) H-AEI-S zeolites

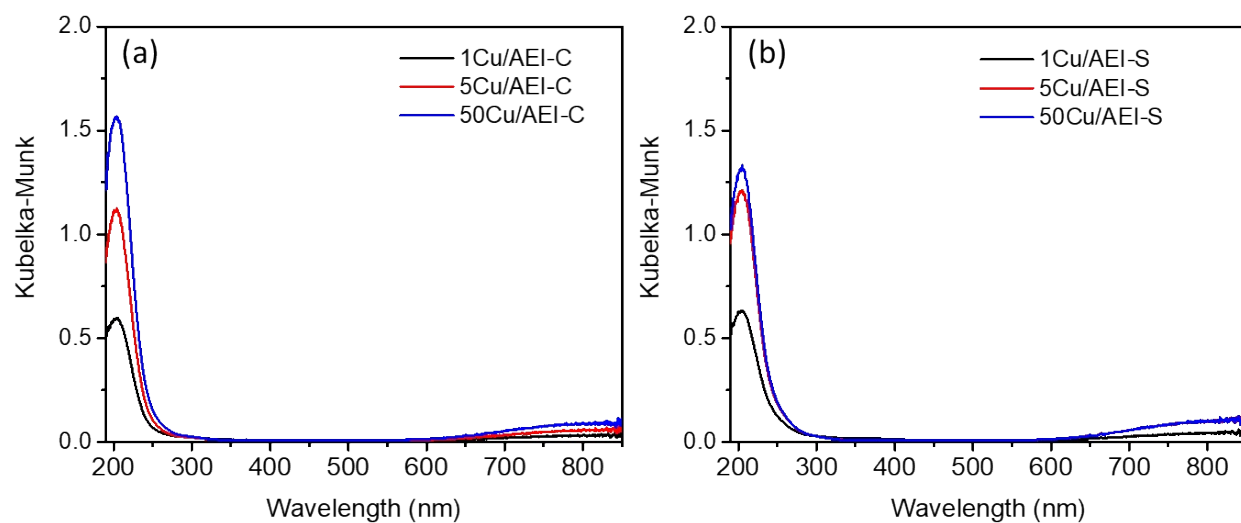

Fig. S5. UV-vis spectra of (a)  $x\text{Cu}/\text{AEI-C}$  and (b)  $x\text{Cu}/\text{AEI-S}$  zeolite catalysts.



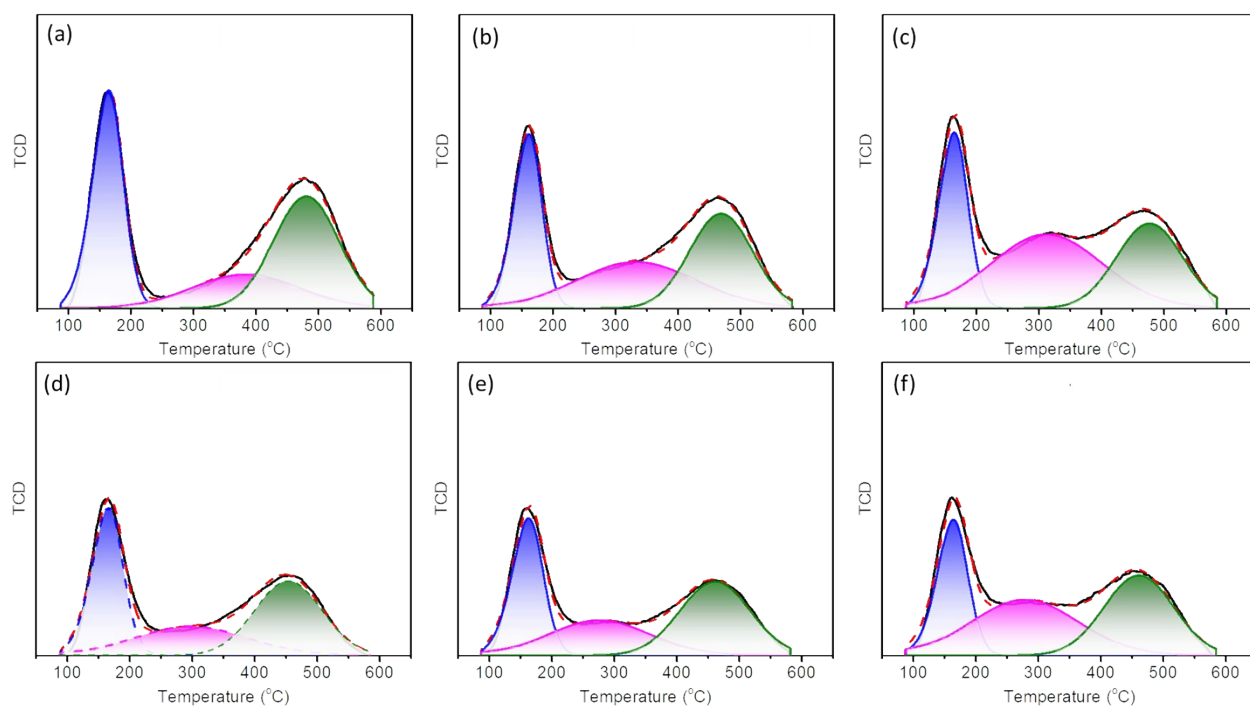

Figure S6. Deconvolution of  $\text{NH}_3$ -TPD curves of (a) 1Cu/AEI-C, (b) 5Cu/AEI-C, (c) 50Cu/AEI-C, (d) 1Cu/AEI-S, (e) 5Cu/AEI-S, (f) 50Cu/AEI-S zeolite catalysts.

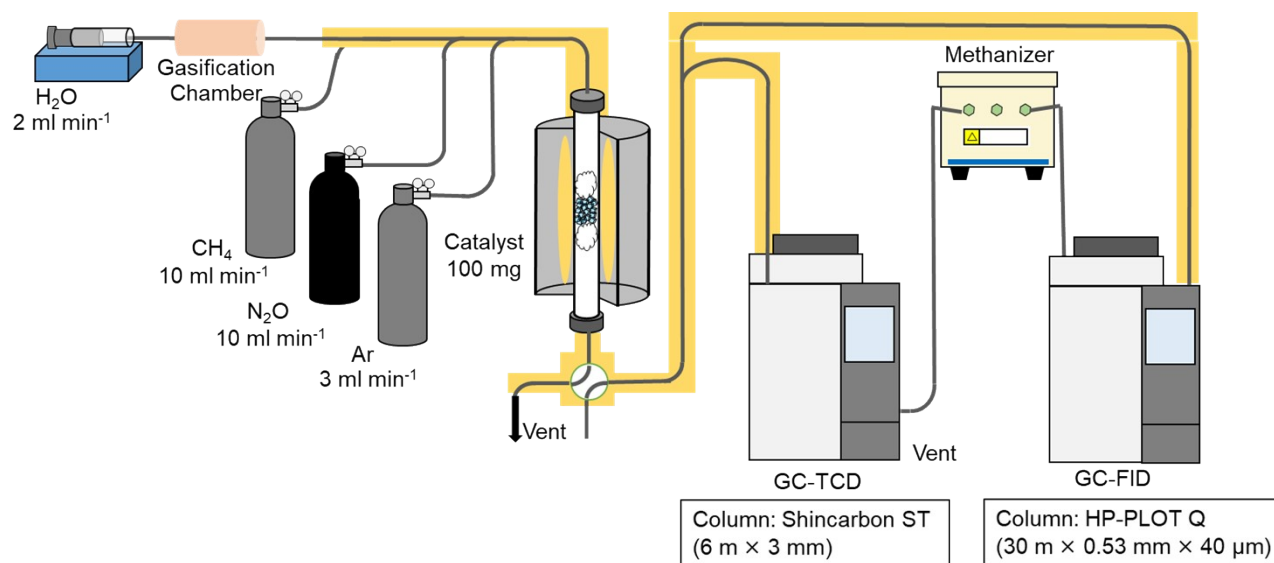

Fig. S7. Schematic diagram of the online-analysis system for continuous direct conversion of methane.

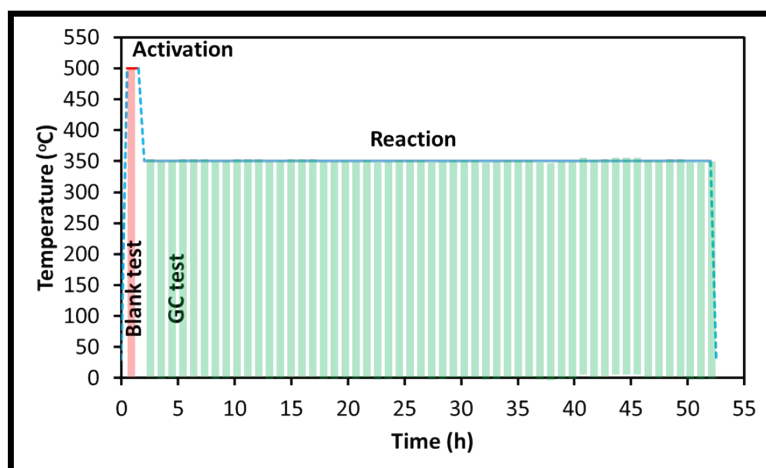

Fig. S8. Temperature program of the continuous oxidation of methane reaction under 350 °C to study the catalytic stability.

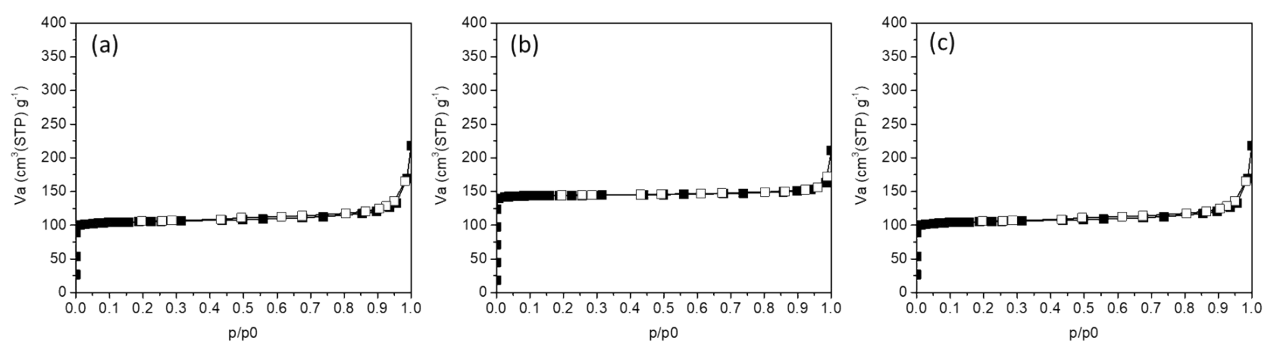

Fig. S9. N<sub>2</sub> adsorption and desorption isotherms of (a) 5Cu/AEI-C-700, (b) 5Cu/AEI-C-800 (c) 5Cu/AEI-S zeolite catalysts.

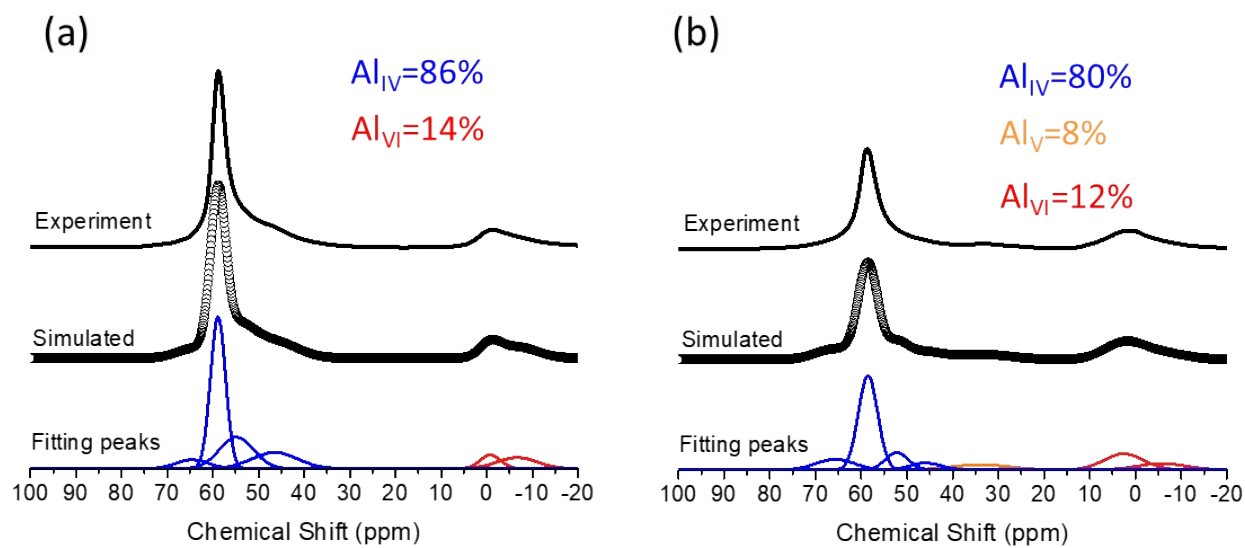

Fig. S10. Deconvolution of  $^{27}\text{Al}$  MAS NMR patterns for (a) H-AEI-C-700 and (b) H-AEI-C-800 zeolites.

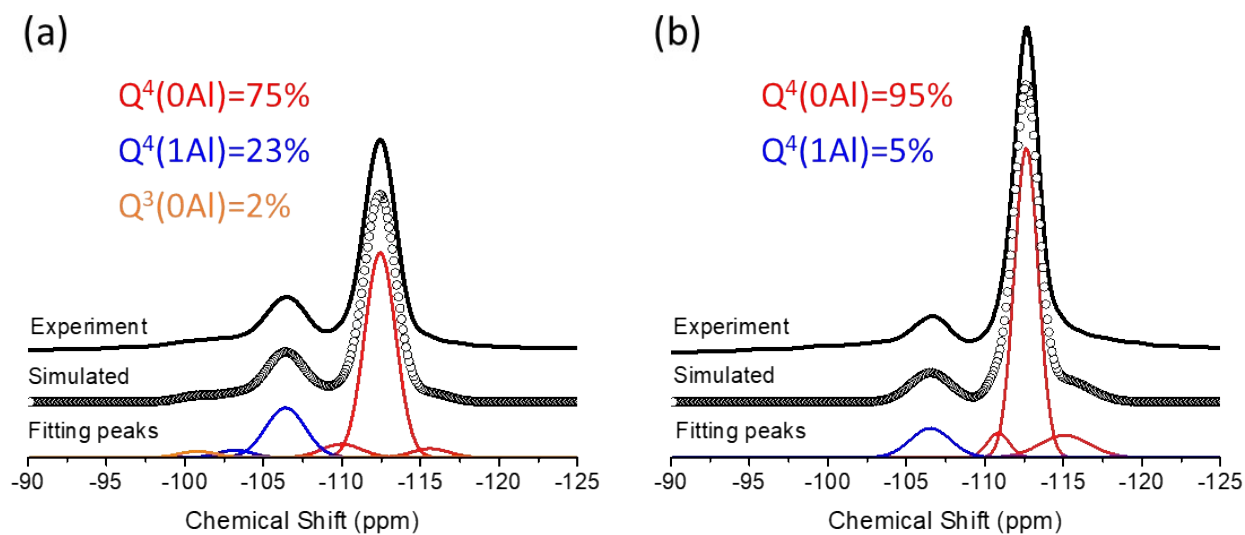

Fig. S11. Deconvolution of  $^{29}\text{Si}$  MAS NMR patterns for (a) H-AEI-C-700 and (b) H-AEI-C-800 zeolites.

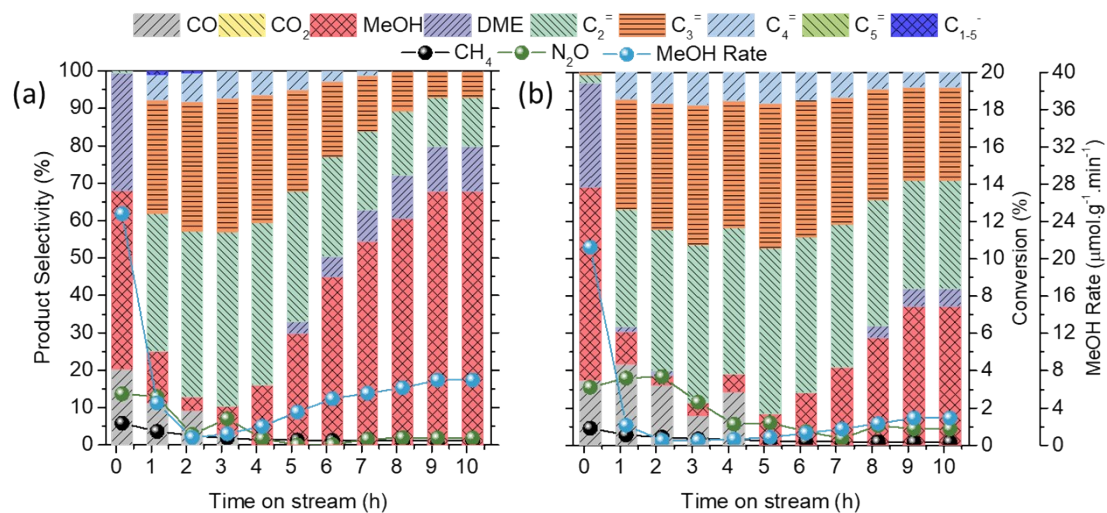

Fig. S12. Stability test of (a) 5Cu/AEI-C-700 and (b) re-prepared 5Cu/AEI-C-700 zeolite catalysts in continuous direct oxidative methane to methanol reaction at 350 °C. Reaction conditions: 100 mg catalyst,  $\text{CH}_4/\text{N}_2\text{O}/\text{H}_2\text{O}/\text{Ar} = 10/10/2/3 \text{ ml min}^{-1}$ ,  $\text{SV} = 15000 \text{ ml} \cdot \text{g}^{-1} \text{ h}^{-1}$ .

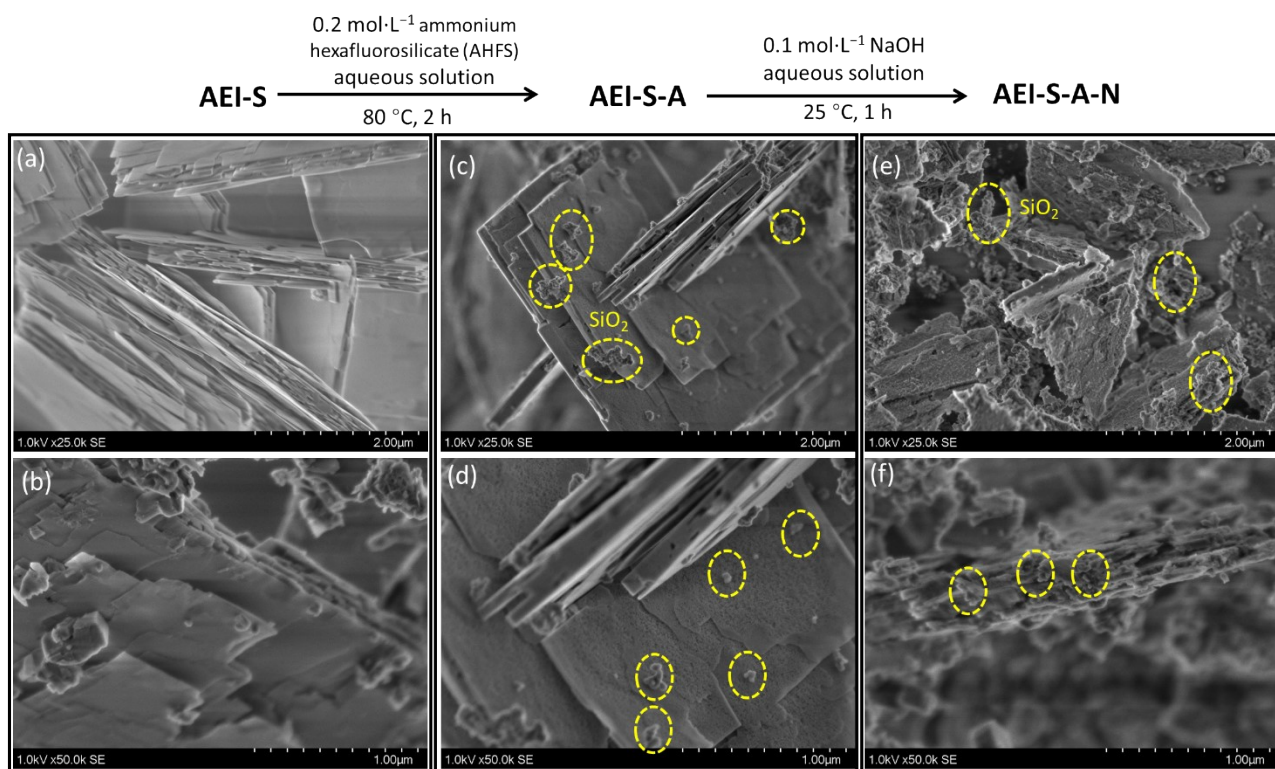

Fig. S13. SEM images of (a, b) AEI-S, (c, d) AEI-S-A, (e, f) AEI-S-A-N zeolites.



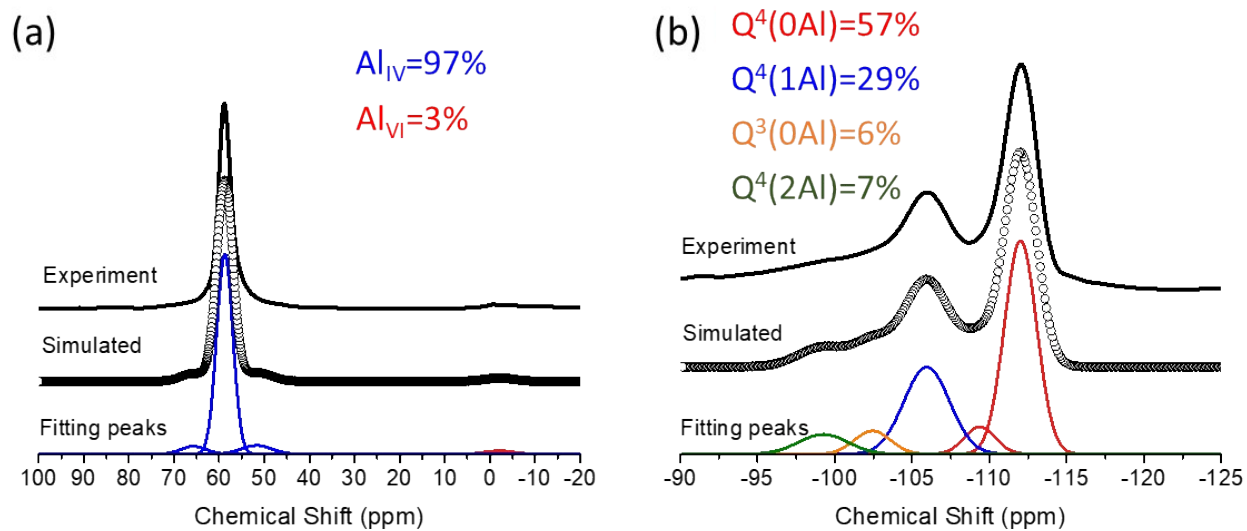

Fig. S14. Deconvolution of (a)  $^{27}Al$  MAS NMR and (b)  $^{29}Si$  MAS NMR pattern for H-AEI-S-A-N zeolite.

Table S1. Reaction performance of Cu/AEI zeolite catalysts in MTM at 350 °C (refer Fig. 5).

| Sample     | Time on stream | Conversion      |                  | Product selectivity |                 |      |      |                             |                             |                             |                               |                             |           | Formation rate                          |
|------------|----------------|-----------------|------------------|---------------------|-----------------|------|------|-----------------------------|-----------------------------|-----------------------------|-------------------------------|-----------------------------|-----------|-----------------------------------------|
|            |                | CH <sub>4</sub> | N <sub>2</sub> O | CO                  | CO <sub>2</sub> | MeOH | DME  | C <sub>2</sub> <sup>=</sup> | C <sub>3</sub> <sup>=</sup> | C <sub>4</sub> <sup>=</sup> | C <sub>2-4</sub> <sup>-</sup> | C <sub>5</sub> <sup>+</sup> | Aromatics | MeOH                                    |
|            | h              | %               |                  | %                   |                 |      |      |                             |                             |                             |                               |                             |           | μmol·g <sup>-1</sup> ·min <sup>-1</sup> |
| 1Cu/AEI-C  | 0.2            | 0.9             | 1.2              | 15.7                | 0.0             | 55.7 | 28.1 | 0.6                         | 0.0                         | 0.0                         | 0.0                           | 0.0                         | 0.0       | 23.5                                    |
|            | 1.2            | 0.7             | 1.0              | 11.1                | 0.0             | 12.1 | 0.0  | 37.6                        | 31.2                        | 6.4                         | 0.0                           | 3.0                         | 0.0       | 3.6                                     |
|            | 2.2            | 0.5             | 1.1              | 6.0                 | 0.0             | 1.9  | 0.0  | 47.0                        | 35.4                        | 7.5                         | 0.0                           | 3.9                         | 0.0       | 0.5                                     |
|            | 3.2            | 0.5             | 1.7              | 0.0                 | 0.0             | 2.3  | 0.0  | 51.0                        | 36.6                        | 8.1                         | 0.0                           | 3.8                         | 0.0       | 0.5                                     |
|            | 4.2            | 0.4             | 1.1              | 0.0                 | 0.0             | 2.2  | 0.0  | 53.3                        | 36.1                        | 7.5                         | 0.0                           | 2.5                         | 0.0       | 0.4                                     |
|            | 5.2            | 0.4             | 1.1              | 0.0                 | 0.0             | 2.2  | 0.0  | 53.3                        | 36.1                        | 7.5                         | 0.0                           | 2.5                         | 0.0       | 0.4                                     |
| 5Cu/AEI-C  | 0.2            | 0.7             | 2.6              | 30.8                | 0.0             | 42.9 | 26.3 | 0.0                         | 0.0                         | 0.0                         | 0.0                           | 0.0                         | 0.0       | 13.0                                    |
|            | 1.2            | 1.1             | 3.8              | 25.2                | 0.0             | 46.5 | 27.7 | 0.5                         | 0.0                         | 0.0                         | 0.0                           | 0.0                         | 0.0       | 21.8                                    |
|            | 2.2            | 1.2             | 2.6              | 29.1                | 0.0             | 45.9 | 24.5 | 0.5                         | 0.0                         | 0.0                         | 0.0                           | 0.0                         | 0.0       | 24.6                                    |
|            | 3.2            | 1.3             | 3.5              | 31.3                | 0.0             | 45.5 | 22.7 | 0.5                         | 0.0                         | 0.0                         | 0.0                           | 0.0                         | 0.0       | 26.4                                    |
|            | 4.2            | 1.2             | 3.5              | 22.2                | 0.0             | 49.1 | 28.1 | 0.6                         | 0.0                         | 0.0                         | 0.0                           | 0.0                         | 0.0       | 25.2                                    |
|            | 5.2            | 1.2             | 4.3              | 20.8                | 0.0             | 53.2 | 25.6 | 0.5                         | 0.0                         | 0.0                         | 0.0                           | 0.0                         | 0.0       | 29.6                                    |
| 50Cu/AEI-C | 0.2            | 0.8             | 1.8              | 46.6                | 19.1            | 24.3 | 10.0 | 0.0                         | 0.0                         | 0.0                         | 0.0                           | 0.0                         | 0.0       | 9.2                                     |
|            | 1.2            | 1.0             | 2.7              | 38.0                | 15.6            | 33.6 | 12.4 | 0.4                         | 0.0                         | 0.0                         | 0.0                           | 0.0                         | 0.0       | 15.7                                    |
|            | 2.2            | 1.5             | 3.6              | 43.3                | 21.8            | 24.7 | 9.9  | 0.3                         | 0.0                         | 0.0                         | 0.0                           | 0.0                         | 0.0       | 17.0                                    |
|            | 3.2            | 1.0             | 2.7              | 38.0                | 15.6            | 33.6 | 12.4 | 0.4                         | 0.0                         | 0.0                         | 0.0                           | 0.0                         | 0.0       | 15.7                                    |
|            | 4.2            | 1.5             | 3.6              | 43.3                | 21.8            | 24.7 | 9.9  | 0.3                         | 0.0                         | 0.0                         | 0.0                           | 0.0                         | 0.0       | 17.0                                    |
|            | 5.2            | 1.5             | 3.6              | 43.3                | 21.8            | 24.7 | 9.9  | 0.3                         | 0.0                         | 0.0                         | 0.0                           | 0.0                         | 0.0       | 17.0                                    |
| 1Cu/AEI-S  | 0.2            | 0.8             | 9.3              | 6.7                 | 0.0             | 69.0 | 23.8 | 0.4                         | 0.0                         | 0.0                         | 0.0                           | 0.0                         | 0.0       | 24.5                                    |
|            | 1.2            | 0.8             | 0.4              | 4.8                 | 0.0             | 57.6 | 33.2 | 3.4                         | 0.0                         | 0.0                         | 0.0                           | 0.9                         | 0.0       | 21.9                                    |
|            | 2.2            | 0.6             | 0.5              | 9.5                 | 0.0             | 7.9  | 0.0  | 37.1                        | 35.2                        | 7.9                         | 1.2                           | 2.8                         | 0.0       | 2.2                                     |
|            | 3.2            | 0.4             | 0.4              | 0.0                 | 0.0             | 5.0  | 0.0  | 45.8                        | 40.5                        | 8.7                         | 0.0                           | 2.2                         | 0.0       | 0.9                                     |
|            | 4.2            | 0.4             | 0.4              | 0.0                 | 0.0             | 5.0  | 0.0  | 45.8                        | 40.5                        | 8.7                         | 0.0                           | 2.2                         | 0.0       | 0.9                                     |
|            | 5.2            | 0.3             | 1.0              | 0.0                 | 0.0             | 6.1  | 0.0  | 45.9                        | 39.8                        | 8.2                         | 0.0                           | 2.0                         | 0.0       | 0.9                                     |
| 5Cu/AEI-S  | 0.2            | 1.0             | 1.9              | 52.4                | 0.0             | 30.7 | 16.3 | 0.6                         | 0.0                         | 0.0                         | 0.0                           | 0.0                         | 0.0       | 13.3                                    |

|            |     |     |     |      |      |      |      |     |     |     |     |     |     |      |
|------------|-----|-----|-----|------|------|------|------|-----|-----|-----|-----|-----|-----|------|
|            | 1.2 | 1.4 | 3.9 | 31.0 | 0.0  | 47.3 | 21.0 | 0.7 | 0.0 | 0.0 | 0.0 | 0.0 | 0.0 | 28.8 |
|            | 2.2 | 1.4 | 3.6 | 25.2 | 0.0  | 49.1 | 24.9 | 0.8 | 0.0 | 0.0 | 0.0 | 0.0 | 0.0 | 29.6 |
|            | 3.2 | 1.6 | 5.0 | 33.2 | 0.0  | 43.8 | 22.1 | 0.9 | 0.0 | 0.0 | 0.0 | 0.0 | 0.0 | 31.8 |
|            | 4.2 | 1.6 | 5.0 | 31.0 | 0.0  | 45.4 | 22.8 | 0.9 | 0.0 | 0.0 | 0.0 | 0.0 | 0.0 | 32.5 |
|            | 5.2 | 1.6 | 5.0 | 31.0 | 0.0  | 45.4 | 22.8 | 0.9 | 0.0 | 0.0 | 0.0 | 0.0 | 0.0 | 32.5 |
| 50Cu/AEI-S | 0.2 | 1.0 | 2.8 | 46.0 | 7.1  | 32.9 | 13.7 | 0.3 | 0.0 | 0.0 | 0.0 | 0.0 | 0.0 | 14.9 |
|            | 1.2 | 1.9 | 4.3 | 27.3 | 23.5 | 36.9 | 11.9 | 0.3 | 0.0 | 0.0 | 0.0 | 0.0 | 0.0 | 31.2 |
|            | 2.2 | 1.8 | 3.4 | 26.8 | 23.7 | 34.7 | 14.4 | 0.4 | 0.0 | 0.0 | 0.0 | 0.0 | 0.0 | 27.9 |
|            | 3.2 | 1.8 | 3.4 | 27.1 | 22.4 | 36.8 | 13.5 | 0.2 | 0.0 | 0.0 | 0.0 | 0.0 | 0.0 | 30.3 |
|            | 4.2 | 1.8 | 3.4 | 29.0 | 23.4 | 33.4 | 13.9 | 0.2 | 0.0 | 0.0 | 0.0 | 0.0 | 0.0 | 27.2 |
|            | 5.2 | 1.8 | 3.4 | 28.7 | 23.1 | 34.6 | 13.6 | 0.0 | 0.0 | 0.0 | 0.0 | 0.0 | 0.0 | 27.7 |
